# Supplementary material for: Enhanced Weathering and related element fluxes – a cropland mesocosm approach
Source: Copernicus journal article supplement (doi:10.5194/bg-17-103-2020), 2020-01-08
Supplement: Supplementary file [file bg-17-103-2020-supplement-title-page.pdf › bg-17-103-2020-supplement-title-page.pdf]

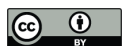

## *Supplement of*

# **Enhanced Weathering and related element fluxes – a cropland mesocosm approach**

**Thorben Amann et al.**

*Correspondence to:* Thorben Amann ([science@thorbenamann.de](mailto:science@thorbenamann.de))

- [bg-17-103-2020-supplement-title-page.pdf](#)
- [\\_\\_MACOSX](#)
  - [.\\_soil\\_chemistry.csv](#)
  - [.\\_supplement.pdf](#)
  - [.\\_water\\_chemistry.csv](#)
- [soil\\_chemistry.csv](#)
- [supplement.pdf](#)
- [water\\_chemistry.csv](#)

The copyright of individual parts of the supplement might differ from the CC BY 4.0 License.
